35 Factors associated with low-risk perception were: residing in peri-urban area (APR=1.23; 95%CI:  
36 1.04 -1.46) and urban areas (APR=0.73; 95%CI:0.54-0.99); having low knowledge of  
37 hypertension (APR=1.98; 95%CI: 1.55-2.53); low trust for health workers (APR=1.13; 95%CI:  
38 1.01-1.25); having no other NCD (APR=1.38; 95%CI: 1.00-1.89); having no family history of  
39 hypertension (APR=1.42; 95%CI: 1.20-1.68); and consumption of sufficient fruits/vegetables  
40 (APR=1.13; 95%CI: 1.01-1.27).

41 **Recommendation:** There is need to implement appropriate health education programs specifically  
42 tailored to increasing knowledge and risk perception for hypertension among PLHIV. Health  
43 workers can integrate routine risk assessments into HIV care to identify PLHIV who are at very  
44 high-risk of developing hypertension and provide them with personalized care. This can influence  
45 adoption of hypertension preventive measures.

46 **Key words:** Hypertension, knowledge, risk perception, HIV

## 47 **Background**

48 Hypertension is a major risk factor for non-communicable Diseases (NCDs), especially  
49 cardiovascular diseases (CVDs). Globally, 13% of all premature deaths annually are due to  
50 hypertension (HTN) [1], and by 2025, about 1.56 billion adults will be living with HTN [2]. In  
51 2017, over 25% of persons living with HIV (PLHIV) globally were reported to be hypertensive  
52 [3]. In Uganda, Antiretroviral Therapy (ART) for PLHIV was rolled out in 2000 and since then,  
53 the morbidity and mortality rate from HIV/AIDS and related complications has been on a decline  
54 [4] accompanied by an increase in chronic degenerative diseases associated with ageing such as  
55 HTN. The dual burden of NCDs especially HTN and HIV/AIDS in Uganda and sub-Saharan  
56 Africa (SSA) in general, is of great public health concern.

57 PLHIV have a 1.5 to 2 times relative risk of developing CVDs at a lower median age when  
58 compared with uninfected people [5]. In Uganda, the prevalence of HTN among PLHIV is on an  
59 increasing trend, in the range of 11-29% according to recent studies in Uganda [6,7]. Specific  
60 ART regimes especially those containing Protease Inhibitors (PI) have been linked to increase in  
61 HTN, CVDs and other NCDs. Kazooba, et al. [8] reported that PI containing ART regimens were  
62 independently associated with 2-fold risks of having abnormal total cholesterol, LDL,  
63 triglycerides, low HDL and HTN compared to non-PI ART regimen. Possible mechanisms that  
64 contribute to the higher burden of HTN among PLHIV include chronic inflammation, adaptive

65 immune activation and increased microbial translocation caused by HIV, blood vessel damage  
66 resulting from long-term ART exposure especially Highly Active ART (HAART) [9] and other  
67 risky behaviours such as excessive alcohol intake, inadequate physical activity and unhealthy  
68 dietary lifestyles [10].

69 Given the high burden of HTN experienced by PLHIV, consistent engagement in preventive  
70 behaviours such as adequate physical activity, healthy eating and reduced alcohol intake is critical  
71 to prevent the condition [11]. For a number of chronic diseases including HTN, symptoms do not  
72 manifest until the disease progresses [12], which influence individual's risk perception. Disease  
73 risk perception refers to a person's subjective judgment about the likelihood of occurrence of a  
74 negative or harmful event such as, illness, injury, extreme stress, disease and death [13]. Risk  
75 perception is an important factor for consideration in public health and risk communication  
76 because it influences which types of risk people care about and how they deal with them. Low risk  
77 perceptions can contribute to undesirable health consequences by acting as a barrier to adoption  
78 and maintenance of preventative health behaviours [14]. Perception of being at higher risk  
79 influences behavioural change resulting into higher uptake of the HTN preventive measures [15].  
80 There is a dearth of information on levels of risk perception for HTN among PLHIV in  
81 Uganda/SSA. This study assessed the level of risk perception for HTN and the associated factors  
82 among adult PLHIV in Kamuli District.

## 83 **Methods**

### 84 **Study design and setting**

85 This was a cross sectional study based on constructs from the Health Belief Model [15] and it was  
86 conducted in public Health Centres (HCs) in Kamuli District. Kamuli is located in the Busoga  
87 region where HIV prevalence is estimated at 4.5% according to the Uganda Population-based HIV  
88 Impact Assessment report, 2020. The district has 14 public HC IIIs which provide HIV counselling  
89 and testing services, ARVs and TB screening, two HC IVs and Kamuli General Hospital which  
90 provides HTS, ARVs, viral load testing, TB and cancer screening. The study was conducted at HC  
91 III, IV plus the General Hospital because these facilities provide regular HIV care services. HIV  
92 clinics operate 2 days per week at HC III and 4 days at HC IV and the hospital. At each of the

93 health facility, HIV care services are stratified into children, youths, maternity and adults to make  
94 them more friendly to the specific age groups.

95

## 96 **Study population, sample size and sampling**

97 The study population were adult PLHIV and all were eligible for inclusion except those who  
98 reported to the health facilities for TB treatment, referred for hospitalization or need urgent care  
99 were excluded. Kish Leslie formula [16] for cross sectional studies, was used to estimate sample  
100 size of 384 based on the following assumptions: a 50% proportion of PLHIV who perceive low-  
101 risk for hypertension and a precision of 5%. Considering a non-response rate of 10%, the sample  
102 size was increased to 422. By purposive sampling, seven out of the 14 HC IIIs were selected for  
103 inclusion preferring those serving bigger number of PLHIV. Besides, the two HC IVs and Kamuli  
104 General Hospital were included. For each of the selected health facilities an estimated total number  
105 of PLHIV served per month was obtained from the HC in-charge and participants were sampled  
106 from each of the HC proportional to size. Participants were recruited into the study by consecutive  
107 sampling until the required sample size at a given health facility was obtained. Participants who  
108 self-reported as having hypertension were discontinued from the study (no longer at risk for  
109 hypertension) and they were reported as non-response. This reduced the denominator from 422 to  
110 392 but still met our sample size of 384.

111

## 112 **Data collection and quality assurance**

113 A structured questionnaire administered by Research Assistants was used for data collection,  
114 which started on 15<sup>th</sup> September 2022 and ended on 30<sup>th</sup> September 2022. Prior to data collection,  
115 Research assistants were trained and sensitized on the purpose of the research, appropriate  
116 procedures of informing potential participants about the research and seeking consent as well as  
117 the data collection. Besides, the Research Assistants could speak fluent English and Lusoga (the  
118 local language) to easily capture the most intended data. The data collection tool (questionnaire)  
119 was pretested among PLHIV at a neighboring Buwenge HC IV in Jinja District in the same Busoga  
120 sub region. After pretesting, the tool was reviewed, and necessary corrections done. In addition,  
121 the tool was submitted to expert NCD Researchers who gave recommendations for edition and

122 made final approval. The approved questionnaire was used by the trained Research Assistants to  
123 collect data through direct face-to-face interviews (one-on-one).

124

## 125 **Measurements**

126 The level of risk perception for HTN was assessed by adapting three measures previously validated  
127 in Uganda through a study that assessed Hepatitis B virus perceptions among pregnant women,  
128 where Cronbach's Alpha coefficient was used to assess internal consistency of scales measuring  
129 risk perception [17]. The measures of risk perception included: - absolute lifetime risk perception,  
130 conditional risk perception and comparative risk perception. For all the three measures of risk  
131 perception, responses were on a 4-point Likert-scale and overall risk perception was obtained by  
132 dichotomizing risk perception into low-risk and high-risk perception. Responses "very low/much  
133 lower" and "low/lower" responses were combined and the new category named "low" while  
134 "high/higher" and "very high/much higher" responses were combined, naming the new category  
135 as "high." Factors associated with the level of risk perception for HTN were assessed including  
136 the following: Level of knowledge of HTN was measured using 8 questions. Every correct  
137 response on knowledge areas was scored 1, and every incorrect response was scored 0. Bloom's  
138 cut-off points were used to categorize knowledge ie.,  $\geq 80\%$  score as high knowledge, 60-79% as  
139 moderate and  $< 60\%$  as low knowledge. Knowledge level was dichotomized by combining levels  
140 "moderate" and "high", naming the new category as "high" Knowledge. Perceived trust in health  
141 workers was measured using items adapted from a scale that assesses trust in community health  
142 workers. The scale was developed and validated in Bangladesh, Haiti, and Kenya [18]. Five  
143 question items were used to measure trust on a 4-point Likert scale which was afterwards  
144 dichotomized by combining responses "never" and "some of the time", naming the new category  
145 as "low trust", and then a combination of "most of the time" and "all of the time", naming the new  
146 category as "high trust." Self-reported clinical factors assessed included having NCD  
147 comorbidities (defined as having experienced at least two of HTN, diabetes, cardiovascular  
148 diseases, cancer), family history of HTN (defined as having one biological family member who  
149 has ever HTN), time since HIV diagnosis, ART exposure status (naive or on ART) and duration  
150 on ART. Participants were asked to self-report each of these factors if they had or never had any  
151 of them. General body health was measured using a single item "How would you rate your current  
152 health status on a scale from 1 to 5?" where 1 was considered poorest and 5 - very good [19].

153 Exposure to behavioural risk factors of HTN such as excessive alcohol intake, smoking cigarette  
154 and insufficient consumption of fruits/vegetables were measured using question items adapted  
155 from the WHO stepwise approach to chronic disease surveillance [20].

156

## 157 **Data management and analysis**

158 The collected data underwent cross-checking and review for completeness and in case missing  
159 data was found, a call back to the participant was made to complete the data. The data was entered  
160 into Microsoft excel and later exported to STATA version 15.0 for analysis. Descriptive analysis  
161 was carried out to provide frequency and percentage distribution of categorical variables such as  
162 sex, marital status, education level, occupation, level of knowledge and risk perception for HTN.  
163 Means and standard deviation were used to summarise continuous variables such as age, monthly  
164 income, time since HIV diagnosis, duration on ART, number of servings of fruits and/vegetables.  
165 The continuous variables were later categorized, for example. age categorized into 18-30, 31-50  
166 and above 50 years, monthly income categorized into 0-65, 66-105 and above 105 US dollars,  
167 fruits and or vegetables consumption categorized into insufficient (if less five servings per day)  
168 and sufficient (if equal or greater than five servings per week).

169 Modified poisson regression was used to conduct bivariate analysis to assess factors associated  
170 with low-risk risk perception, considering a p-value  $<0.2$ . Multicollinearity was checked and sex  
171 was found to be highly correlated with age (correlation coefficient  $\geq 0.4$ ), thus it (sex) was dropped  
172 in the final multivariate analysis. Factors with p-value  $<0.2$  at bivariate level of analysis were  
173 included into multivariable analysis to assess factors independently associated with low-risk  
174 perception for hypertension. Using modified Poisson regression [21], stepwise elimination  
175 procedure was used during model building, which involved adding qualified variables one at a  
176 time into multivariable analysis while dropping those with least significance. A model with a  
177 smaller Akaike's information criterion and a log-likelihood ratio closer to zero was selected as the  
178 best fit for the data. Factors with p-value  $<0.05$  were reported as those independently associated  
179 with low-risk perception for hypertension.

180

## 181 **Ethical considerations**

182 This study was approved by Makerere University School of Public health's Higher Degrees,

183 Research and Ethics Committee (study protocol number 090) and each participants gave written  
 184 informed consent prior to participation.

185

## 186 Results

### 187 Socio-demographic characteristics of respondents

188 More than half, 60.2.0% (236/392) of the respondents were females, mean age was 37.1(±14.1)  
 189 years, 58.2% had not gone beyond primary level of education and 79.1% had a monthly income  
 190 not exceeding 65% dollars (Table 1).

191 **Table 1: Socio-demographic characteristics of adults PLHIV in Kamuli district.**

| Variable                                               | Attribute                          | Frequency (n=392) | Percentage (%) |
|--------------------------------------------------------|------------------------------------|-------------------|----------------|
| <b>Sex</b>                                             | Female                             | 236               | 60.2           |
|                                                        | Male                               | 156               | 39.8           |
| <b>Age (mean=37.1, SD= (±14.1) years</b>               | 18-30                              | 163               | 41.6           |
|                                                        | 31-50                              | 162               | 41.3           |
|                                                        | Above 50                           | 67                | 17.1           |
| <b>Type of residence</b>                               | Rural                              | 236               | 60.2           |
|                                                        | Peri-urban                         | 106               | 27.0           |
|                                                        | Urban                              | 50                | 12.8           |
| <b>Religion</b>                                        | Catholic                           | 158               | 40.3           |
|                                                        | Anglican                           | 47                | 12.0           |
|                                                        | Muslim                             | 46                | 11.7           |
|                                                        | Born again/Pentecostal             | 84                | 21.4           |
|                                                        | Others                             | 57                | 14.6           |
| <b>Marital status</b>                                  | Single                             | 120               | 30.6           |
|                                                        | Married                            | 224               | 57.1           |
|                                                        | Divorced/Separated/widowed         | 48                | 12.3           |
| <b>Highest level of education</b>                      | Primary and below                  | 228               | 58.2           |
|                                                        | Secondary                          | 98                | 25.0           |
|                                                        | Institute (certificate or diploma) | 41                | 10.4           |
|                                                        | University                         | 25                | 6.4            |
| <b>Current occupation</b>                              | Professional/Technical             | 50                | 12.8           |
|                                                        | Farmer                             | 189               | 48.2           |
|                                                        | Self-employed in business          | 65                | 16.6           |
|                                                        | Others                             | 88                | 22.4           |
| <b>Current monthly income in United States Dollars</b> | 0 – 65                             | 310               | 79.1           |
|                                                        | 66 – 105                           | 49                | 12.5           |
|                                                        | Above 105                          | 33                | 8.4            |
| <b>Response rate</b>                                   | Response                           | 392               | 92.9           |

Non-response

30

7.1

192

193 **Level of risk perception for hypertension among adult PLHIV in**  
194 **Kamuli district (n=392)**

195 Overall, 68.1% (267/392) of the respondents had a low-risk perception for HTN (Fig 1).  
196 Particularly, 62.5% (245/392) believed that their absolute risk of developing HTN in a lifetime  
197 was low, and only 31.9% (125/392) believed they had very high likelihood of developing HTN  
198 when aged 35+ years Figure 1.

199 Figure 1: Level of risk perception for HTN among adult PLHIV in Kamuli District, Uganda

200

201 **Factors associated with the low level of risk perception for**  
202 **hypertension among adult PLHIV in Kamuli District (n=392).**

203 At bivariate analysis, residing in an urban area was negatively associated with low-risk perception  
204 for HTN. On the other hand, having secondary education, low knowledge, low level of trust,  
205 having no other NCDs and no family history of HTN were positively associated with low-risk  
206 perception for HTN. At multivariable analysis, residence in peri-urban area was positively  
207 associated with low-risk perception for hypertension (APR=1.23; 95%CI: 1.04-1.46), while  
208 residing in an urban area was negatively associated with a low-risk perception. Compared to those  
209 who did not have any formal education, respondents who perceived themselves to be at low-risk  
210 among those with secondary level education was 23% (APR=1.23; 95%CI: 1.02 -1.47) and 95%  
211 among those with tertiary education (APR=1.95; 95%CI: 1.43-2.67). Furthermore, respondents  
212 with a low level of HTN knowledge had a 98% low level of risk perception compared to those  
213 with a high level of HTN knowledge (APR=1.98; 95%CI: 1.55-2.53). Additionally, low level of  
214 trust for health workers who conduct HTN awareness (APR=1.13; 95%CI: 1.01-1.25), having no  
215 other NCD (APR=1.39; 95%CI: 1.01-1.89), having no family history of HTN (APR=1.39; 95%CI:  
216 1.14-1.58), engagement in inadequate vigorous intensity PA (APR=1.23; 95%CI: 1.10-1.37), and  
217 consumption of sufficient fruits and vegetables (APR=1.13; 95%CI: 1.01-1.27) were associated  
218 with low-risk perception for HTN as shown in Table 2.

219



220

221

222 **Table 2: Factors associated with low-risk perception for HTN among adult PLHIV in**  
 223 **Kamuli District.**

| Variable                       | Level of risk perception |                       | Unadjusted PR<br>at 95% CI | P-<br>values      | Adjusted PR at<br>95% CI | P-values          |
|--------------------------------|--------------------------|-----------------------|----------------------------|-------------------|--------------------------|-------------------|
|                                | Low<br>(N=267)<br>F (%)  | High (N=125)<br>F (%) |                            |                   |                          |                   |
| <b>Age</b>                     |                          |                       |                            |                   |                          |                   |
| 18-30                          | 127 (47.6)               | 36 (28.8)             | 1                          |                   | 1                        |                   |
| 31-50                          | 107 (40.1)               | 55 (44.0)             | 0.85 (0.74-0.97)           | <b>0.019</b>      | 1.12 (0.99-1.27)         | 0.069             |
| 51+                            | 33 (12.4)                | 34 (27.2)             | 0.63 (0.49-0.82)           | <b>&lt;0.001</b>  | 0.73 (0.67-1.03)         | 0.096             |
| <b>Sex</b>                     |                          |                       |                            |                   |                          |                   |
| Male                           | 105 (39.3)               | 51 (40.8)             | 1                          |                   |                          |                   |
| Female                         | 162 (60.7)               | 74 (59.2)             | 1.02 (0.89-1.17)           | 0.782             |                          |                   |
| <b>Residence</b>               |                          |                       |                            |                   |                          |                   |
| Rural                          | 172 (64.4)               | 65 (52.0)             | 1                          |                   | 1                        |                   |
| Peri-urban                     | 82 (30.7)                | 23 (18.4)             | 1.08 (0.95-1.22)           | 0.262             | 1.23 (1.04-1.45)         | <b>0.014</b>      |
| Urban                          | 13 (4.9)                 | 37 (29.6)             | 0.36 (0.22-0.58)           | <b>&lt;0.001</b>  | 0.73 (0.54-0.99)         | <b>0.049</b>      |
| <b>Education level</b>         |                          |                       |                            |                   |                          |                   |
| None                           | 29 (10.9)                | 19 (15.2)             | 1                          |                   | 1                        |                   |
| Primary                        | 114 (42.7)               | 66 (52.8)             | 1.05 (0.81-1.35)           | 0.717             | 1.09 (0.90-1.32)         | 0.379             |
| Secondary                      | 90 (33.7)                | 8 (6.4)               | 1.52 (1.20-1.93)           | <b>0.001*</b>     | 1.23 (1.02-1.47)         | <b>0.028*</b>     |
| Tertiary                       | 34 (12.7)                | 32 (25.6)             | 0.85 (0.61-1.18)           | 0.341             | 1.95 (1.43-2.67)         | <b>&lt;0.001*</b> |
| <b>Level of HTN knowledge</b>  |                          |                       |                            |                   |                          |                   |
| High                           | 36 (13.5)                | 97 (77.6)             | 1                          |                   | 1                        |                   |
| Low                            | 231 (86.5)               | 28 (22.4)             | 3.29 (2.48-4.37)           | <b>&lt;0.001*</b> | 1.98 (1.55-2.53)         | <b>&lt;0.001*</b> |
| <b>Trust in health workers</b> |                          |                       |                            |                   |                          |                   |
| High                           | 211 (79.0)               | 125 (100.0)           | 1                          |                   | 1                        |                   |
| Low                            | 56 (21.0)                | 0 (0.0)               | 1.59 (1.47-1.73)           | <b>&lt;0.001*</b> | 1.13 (1.01-1.25)         | <b>0.025*</b>     |
| <b>NCD comorbidity</b>         |                          |                       |                            |                   |                          |                   |
| Yes                            | 20 (7.5)                 | 67 (53.6)             | 1                          |                   | 1                        |                   |
| No                             | 247 (92.5)               | 58 (46.4)             | 3.52 (2.39-5.20)           | <b>&lt;0.001*</b> | 1.38 (1.00-1.89)         | <b>0.049*</b>     |
| <b>Family history of HTN</b>   |                          |                       |                            |                   |                          |                   |
| Yes                            | 73 (27.3)                | 111 (88.8)            | 1                          |                   | 1                        |                   |
| No                             | 194 (72.7)               | 14 (11.2)             | 2.35 (1.96-2.82)           | <b>&lt;0.001</b>  | 1.42 (1.20-1.68)         | <b>&lt;0.001*</b> |
| <b>Vigorous intensity PA</b>   |                          |                       |                            |                   |                          |                   |
| Adequate                       | 164 (61.4)               | 80 (64.0)             | 1                          |                   | 1                        |                   |
| Inadequate                     | 103 (38.6)               | 45 (36.0)             | 1.04 (0.90-1.19)           | 0.621             | 1.23 (1.10-1.37)         | <b>&lt;0.001*</b> |
| <b>Currently smoker</b>        |                          |                       |                            |                   |                          |                   |
| Yes                            | 7 (2.6)                  | 9 (7.2)               | 1                          |                   |                          |                   |
| No                             | 260 (97.4)               | 116 (92.8)            | 1.58 (0.90-2.77)           |                   |                          |                   |
| <b>Fruit/vegetables intake</b> |                          |                       |                            |                   |                          |                   |
| Insufficient                   | 166 (62.2)               | 119 (95.2)            | 1                          |                   | 1                        |                   |
| Sufficient                     | 101 (37.8)               | 6 (4.8)               | 1.62 (1.45-1.81)           | <b>&lt;0.001*</b> | 1.13 (1.01-1.27)         | <b>0.047*</b>     |

224

## 225 Discussion

226 This study assessed the level of risk perception for HTN and the associated factors among adult

227 PLHIV in Kamuli District. More than half of the respondents perceived to be at low-risk for HTN

228 and associated factors were: having higher education level, low HTN knowledge, peri-urban  
229 residency, having low trust in health workers, having no family history of HTN and no NCD  
230 comorbidities.

231 Although high-risk perception is essential for an individual to take timely and efficient behavioural  
232 measures to prevent development of a given disease or health condition, our study found that  
233 68.1% of the respondents had a low-risk perception for HTN. The low-risk perception may be  
234 attributed to the observed higher proportion of respondents with low knowledge about HTN, low  
235 prevalence of NCD comorbidities, and low proportions of respondents with family history of HTN.  
236 Similarly, low-risk perception for HTN was reported in Kenya with the majority of the respondents  
237 having inappropriate attitude towards the preventive measures for HTN [22]. Related findings  
238 were reported by a study conducted among adults with HTN in Ethiopia where majority (58.6%)  
239 of the participants had a low-risk perception for CVDs [23]. Our findings were also consistent with  
240 a study conducted among adult PLHIV in Rwanda which reported that respondents had low risk  
241 perception for NCDs [24]. The observed low-risk perception for HTN highlights the need for  
242 targeted interventions to improve HTN risk perception and promote uptake of preventive  
243 behaviours among PLHIV.

244 Our study found that residing in a peri-urban area was positively associated with low-risk  
245 perception for HTN, which may be due to limited information (thus low knowledge) among  
246 PLHIV in peri urban areas thus perceive low risk. In contrast, respondents who resided in urban  
247 areas perceived to be at higher risk for HTN compared to rural dwellers, possibly due to easy  
248 access to health information on Televisions and radios. An informed population is more likely to  
249 perceive higher risk and make healthy lifestyle choices and adopt positive health-oriented  
250 behaviours [25]. Surprisingly, we found that respondents who had attained higher education levels  
251 (secondary and tertiary) were more likely to have low-risk perception for HTN compared to those  
252 with no education. People with a formal education may have higher knowledge about HTN and  
253 thus adopt and maintain its preventive measures and may perceive being at low risk. Relatedly,  
254 among people living with HIV in Chitungwiza Hospital Zimbabwe, having low education level  
255 (primary or less) was associated with negative perception about NCD management compared to  
256 those with higher education ( $P<0.01$ ) [26]. On the otherhand, a study by Cioe et al. [27] found that  
257 knowledge of HTN risk factors did not predict perceived risk for HTN among PLHIV in Rhode

258 Island Hospital -USA ( $p>0.05$ ). Contrary to findings of the USA study, our study findings  
259 indicated that respondents with low knowledge of HTN had low risk perception for the condition  
260 compared to those with high level of knowledge. These findings underscore the need for health  
261 education interventions to improve HTN knowledge and facilitate reduction of engagement in  
262 behavioural risks for HTN. These education interventions need to be tailored to the educational  
263 levels of the target population and integrated into HIV care services. For our study, age did not  
264 independently predict risk perception for HTN, which contrast with findings of a study conducted  
265 among adult men in Nigeria, where respondents' perceived risk for prostate cancer increased with  
266 age ( $\beta=0.014$ ) [28]. Relatedly, a cross sectional survey among South African adult men found that  
267 age of respondent independently predicted level of risk perception for NCDs [14]. Our study found  
268 that respondents with high level of trust in health workers who conduct HTN awareness had a  
269 higher risk perception for HTN compared to those who had low level of trust. Having high trust in  
270 health workers may increase the patients' HTN risk perception due to higher confidence in the  
271 health information. Similar to our findings, trust has been reported to play a significant role in  
272 predicting people's health risk perceptions and disease preventive behaviors in Uganda [29].  
273 Relatedly, client trust in CHWs offering maternal and newborn health education was reported to  
274 result into acceptability of the health services and responsiveness to health education programs  
275 [30]. Our findings suggest that the more people trust the health workers and the risk awareness  
276 information received, the more likely they will accept and believe that they are at higher risk for  
277 that particular condition. Our findings highlight the need for strengthening healthcare provider  
278 training on the link between HIV and HTN to enhance their confidence in HTN risk  
279 communication to PLHIV and improve their trust by PLHIV. Besides, we found that respondents  
280 with no NCD comorbidities perceived themselves to be at low-risk for HTN compared to those  
281 with comorbidities. People without NCD comorbidities are likely to self-rate their general health  
282 status as good hence perceive low-risk for HTN. Besides, people with one or more NCDs are more  
283 likely to seek for more information on risk factors and thus gain much knowledge which can  
284 influence them to perceive higher risk for other NCDs. Individuals with no underlying NCDs may  
285 feel not bothered about HTN thereby perceiving to be at low risk. Our study also found that  
286 respondents without a family history of HTN had a low-risk perception for HTN compared to those  
287 with one. This could be because PLHIV with a family history are more likely to consider  
288 themselves susceptible and believe they may develop the disease. While local context literature on

289 the association between HTN risk perception and family history is limited, studies elsewhere have  
290 reported a positive association between family history of HTN and perception of risk for CVDs  
291 ( $p < 0.01$ ) [31,32]. Indeed, there is available literature which suggests that genetic factors are  
292 responsible for about 30% change in blood pressure [33]. Our findings were in agreement with a  
293 study conducted among female students in Ghana where respondents without a family history of  
294 breast cancer were 90% less likely to perceive breast cancer risk (AOR = 0.10, 95% CI = 0.04–  
295 0.29) compared to those with family history of the cancer [34]. Relatedly, adult persons in  
296 Johannesburg (South Africa) who had a family medical history of NCDs self-perceived to be at  
297 high-risk of developing NCDs [14]. These findings reveal the need to develop tailored risk  
298 awareness interventions for PLHIV with neither NCD comorbidities nor family history of HTNs  
299 so as to increase their level of HTN risk perceptions.

### 300 **Study strengths and limitations**

301 We believe that there were key strengths in our findings; question items used to measure risk  
302 perception (primary outcome) were adapted from a tool validated through a recent study conducted  
303 among adult women in Uganda [17]. This increased internal validity of the findings. However,  
304 these findings are subject to limitations. For instance, purposive inclusion of high-volume health  
305 facilities and the consecutive sampling used for this study are prone to selection bias. Besides, the  
306 self-reporting method used to measure some of the variables is subject to recall bias. Nonetheless,  
307 our study considered a fairly large sample size to increase validity.

308

### 309 **Conclusion**

310 This study found that that a higher proportion of PLHIV (68.1%) perceived to be at low-risk for  
311 HTN, despite the fact that PLHIV are generally a high-risk group given the relationship between  
312 HIV and HTN/NCDs. Key factors independently associated with low-risk perception for HTN  
313 were having low HTN knowledge, low trust in health workers, having no family history of HTN  
314 and no NCD comorbidity. There is need to implement appropriate health education programs  
315 specifically tailored to increasing HTN knowledge and risk perception among PLHIV. Besides,  
316 there is need to develop and implement risk awareness interventions for PLHIV with neither NCD  
317 comorbidities nor family history of HTNs to increase their level of HTN risk perception. Health  
318 workers should integrate routine HTN risk assessments into HIV care services to identify PLHIV

319 who are at very high-risk of developing HTN and provide them with personalized care. By  
320 implementing these strategies, it is possible to improve knowledge and risk perception for HTN  
321 and foster uptake of preventive behaviours but also promote early detection and management of  
322 HTN among adult PLHIV.

323

#### 324 **Supplementary information: -**

- 325 1. Figure 1: Level of risk perception for HTN among adult PLHIV in Kamuli District, Uganda
- 326 2. Data set in excel

## 327 **References**

- 328 1. Lawes CM, Vander Hoorn S, Rodgers A. Global burden of blood-pressure-related disease, 2001.  
329 *The Lancet*, 371(9623),. 2008;1513-1518.
- 330 2. Kearney PM, Whelton M, Reynolds K, Muntner P, Whelton PK, He J. Global burden of  
331 hypertension: analysis of worldwide data. *The lancet*, 365(9455),. 2005;217-223.
- 332 3. Xu Y, Chen X, Wang K. Global prevalence of hypertension among people living with HIV: a  
333 systematic review and meta-analysis. *Journal of the American Society of Hypertension*, 11(8).  
334 2017;530–40.
- 335 4. Bakanda C, Birungi J, Mwesigwa R, Nachega JB, Chan K, Palmer A, et al. Survival of HIV-infected  
336 adolescents on antiretroviral therapy in Uganda: findings from a nationally representative cohort  
337 in Uganda. *PloS one*, 6(4), e19261. 2011;
- 338 5. Feinstein F MJ, Hsue PY, Benjamin LA, Bloomfield GS, Currier JS, Freiberg MS. Characteristics,  
339 prevention, and management of cardiovascular disease in people living with HIV: a scientific  
340 statement from the American Heart Association. *Circulation*, 140(2), e98-e124. 2019;
- 341 6. Kwarisiima D, Balzer L, Heller D, Kotwani P, Chamie G, Clark T, et al. Population-based assessment  
342 of hypertension epidemiology and risk factors among HIV-positive and general populations in  
343 rural Uganda. *PloS one*, 11(5) e0156309. 2016;
- 344 7. Lubega G, Mayanja B, Lutaakome J, Abaasa A, Thomson R, Lindan C. Prevalence and factors  
345 associated with hypertension among people living with HIV/AIDS on antiretroviral therapy in  
346 Uganda. *The Pan African Medical Journal*, 38. 2021;
- 347 8. Kazooba P, Kasamba I, Mayanja BN, Lutaakome J, Namakoola I, Salome T, et al. Cardiometabolic  
348 risk among HIV-POSITIVE Ugandan adults: prevalence, predictors and effect of long-term  
349 antiretroviral therapy. *Pan African Medical Journal*, 27(1). 2017;

- 350 9. Masenga SK, Hamooya BM, Nzala S, Kwenda G, Heimbürger DC, Mutale W, et al. Patho-immune  
351 mechanisms of hypertension in HIV: a systematic and thematic review. *Current hypertension*  
352 *reports*, 21(7),. 2019;1-19.
- 353 10. Guwatudde D, Mutungi G, Wesonga R, Kajjura R, Kasule H, Muwonge J, et al. The epidemiology of  
354 hypertension in Uganda: findings from the national non-communicable diseases risk factor  
355 survey. *PloS one*, 10(9), e0138991. 2015;
- 356 11. Okello S, Amir A, Bloomfield GS, Kentoffio K, Lugobe HM, Reynolds Z, et al. Prevention of  
357 cardiovascular disease among people living with HIV in sub-Saharan Africa. *Progress in*  
358 *cardiovascular diseases*, 63(2), . 2020;149–59.
- 359 12. Sawicka K, Szczyrek M, Jastrzebska I, Prasal M, Zwolak A, Daniluk J. Hypertension—the silent killer.  
360 *Journal of Pre-Clinical and Clinical Research*, 5(2). 2011;
- 361 13. Goulding L, Furze G, Birks Y. Randomized controlled trials of interventions to change maladaptive  
362 illness beliefs in people with coronary heart disease: systematic review. *Journal of advanced*  
363 *nursing*, 66(5),. 2010;946-961.
- 364 14. Kaba Z, Khamisa N, Tshuma N. Age-group differences in risk perceptions of non-communicable  
365 diseases among adults in Diepsloot township, Johannesburg, South Africa: A cross-sectional study  
366 based on the Health Belief Model. *South African medical journal*, 107(9),. 2017;797-804.
- 367 15. Champion VL, Skinner CS. The health belief model. *Health behavior and health education:*  
368 *Theory, research, and practice*, 4,. 2008;45-65.
- 369 16. Kish L. Selection Techniques. *Genetics and the epidemiology of chronic diseases*. 1965;1163:165.
- 370 17. Nankya-Mutyoba J, Aizire J, Makumbi F, Ocamo P, Kirk GD. Hepatitis B virus perceptions and  
371 health seeking behaviors among pregnant women in Uganda: implications for prevention and  
372 policy. *BMC health services research*, 19(1),. 2019;1-11.
- 373 18. Sripad P, McClair TL, Casseus A, Hossain S, Abuya T, Gottert A. Measuring client trust in  
374 community health workers: a multi-country validation study. *Journal of Global Health*, 11. 2021;
- 375 19. Maffei S, Meloni A, Deidda M, Sciomer S, Cugusi L, Cadeddu C, et al. Cardiovascular Risk  
376 Perception and Knowledge among Italian Women: Lessons from IGENDA Protocol. *Journal of*  
377 *Clinical Medicine*, 11(6), 1695. 2022;
- 378 20. O WH. WHO STEPS surveillance manual: the WHO STEPwise approach to chronic disease risk  
379 factor surveillance (No. WHO/NMH/CHP/SIP/05.02). World Health Organization. 2005;
- 380 21. Zou G. A modified poisson regression approach to prospective studies with binary data. *American*  
381 *journal of epidemiology*, 159(7),. 2004;702-706.
- 382 22. Temu MT, Kirui N, Wanjalla C, Ndungu MA, Kamano, J. H., Inui, T. S., & Bloomfield, G. S. .

- 383 Cardiovascular health knowledge and preventive practices in people living with HIV in Kenya.  
384 *BMC infectious diseases*, 15(1),. 2015;1-8.
- 385 23. Bekele D. M, Goshu D. Y., Yalew A. W., Higgins M. K, Gary R. A. Low Subjective Cardiovascular  
386 Disease Risk Perceptions among Hypertensive Patients in Addis Ababa, Ethiopia. *Integrated Blood*  
387 *Pressure Control*, 15, 81. 2022;
- 388 24. Biraguma J, Mutimura E, Frantz MJ. Knowledge about modifiable risk factors for non-  
389 communicable diseases adults living with HIV in Rwanda. *African health sciences*, 19(4),.  
390 2019;3181-3189.
- 391 25. Adorni R, Zanatta F, D’Addario M, Atella F, Costantino E, Iadecola C, et al. Health-Related  
392 Lifestyle Profiles in Healthy Adults: Associations with Sociodemographic Indicators, Dispositional  
393 Optimism, and Sense of Coherence. *Nutrients*, 13(11), 3778. 2021;
- 394 26. Cheza A, Tlou B. Knowledge and perceptions about non-communicable diseases by people living  
395 with HIV: a descriptive cross-sectional study from Chitungwiza Central Hospital Zimbabwe.  
396 *African Health Sciences*, 4(4),. 2022;443-451.
- 397 27. Cioe P. A, Crawford S. L, Stein M. D. Cardiovascular risk-factor knowledge and risk perception  
398 among HIV-infected adults. *Journal of the Association of Nurses in AIDS Care*, 25(1),. 2014;60-69.
- 399 28. Adedeji AI, Lawal AS, Aluko-Arowolo S, Oduwole OE. Men in rural Nigeria have a poor perception  
400 of prostate cancer risk; Hence they seldom seek screening. *Psycho-Oncology*, 30(5),. 2021;773-  
401 779.
- 402 29. Nshakira-Rukundo E, Whitehead A. Changing perceptions about COVID-19 risk and adherence to  
403 preventive strategies in Uganda: Evidence from an online mixed-methods survey. *Scientific*  
404 *African*, 14, e01049. 2021;
- 405 30. Singh D, Cumming R, Negin J. Acceptability and trust of community health workers offering  
406 maternal and newborn health education in rural Uganda. *Health education research*, 30(6),.  
407 2015;947-958.
- 408 31. Imes C. C, Lewis F. M.. Family history of cardiovascular disease (CVD), perceived CVD risk, and  
409 health-related behavior: A review of the literature. *The Journal of cardiovascular nursing*, 29(2),  
410 108. 2014;
- 411 32. Juhola J, Oikonen M, Magnussen CG, Mikkilä V, Siitonen N, Jokinen E, et al. Childhood physical,  
412 environmental, and genetic predictors of adult hypertension: the cardiovascular risk in young  
413 Finns study. *Circulation [Internet]*. 2012 Jul 24 [cited 2024 Mar 6];126(4):402–9. Available from:  
414 <https://pubmed.ncbi.nlm.nih.gov/22718800/>
- 415 33. Gupta-Malhotra M, Banker A, Shete S, Hashmi SS, Tyson EJ, Barratt SM, et al. Essential  
416 hypertension vs. secondary hypertension among children. *American journal of hypertension*,

417 28(1),. 2015;73-80.

418 34. Osei E, Osei Afriyie S, Oppong S, Ampofo E, Amu H. Perceived breast Cancer risk among female  
419 undergraduate students in Ghana: a cross-sectional study. J Oncol. 2021;

420

421



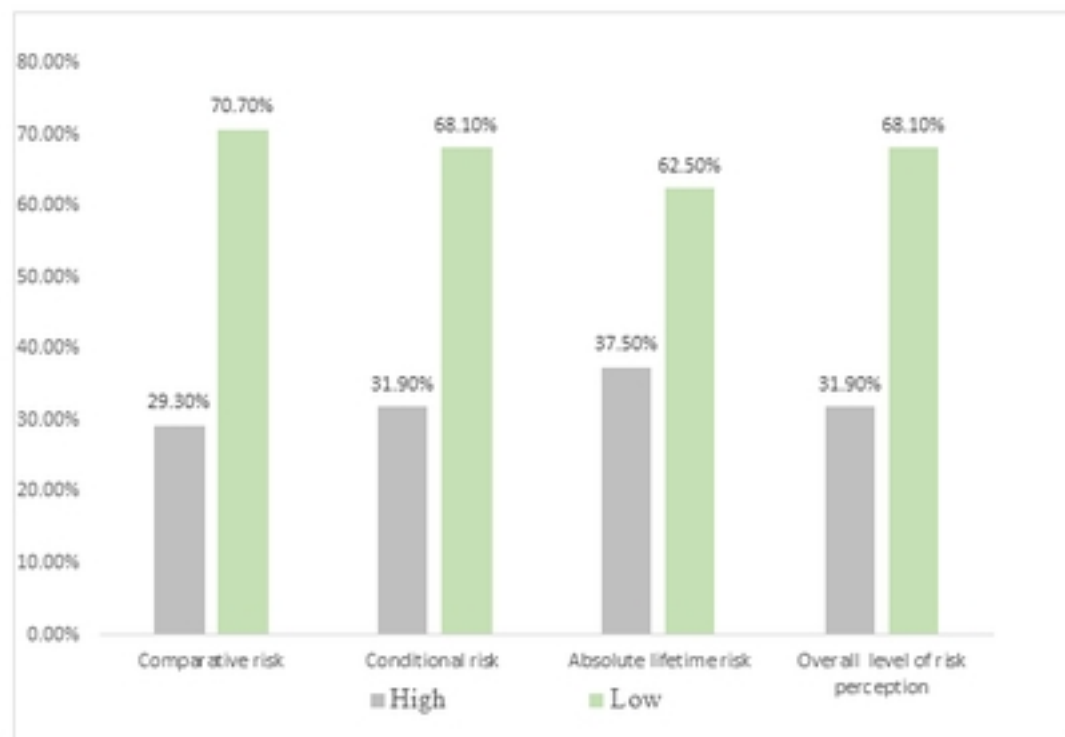

Figure
